# Supplementary material for: Utility and limitations of EEG in the diagnosis and management of ALDH7A1-related pyridoxine-dependent epilepsy. A retrospective observational study
Source: PubMed Central journal article supplement (PMC10899485; doi:10.3389/fneur.2024.1355861), 2024-02-14
Supplement: Data_Sheet_1.pdf [file Data_Sheet_1.pdf]

## Supplementary file

## Overview of longitudinal EEG background and epileptiform activity in subjects &lt; 16 y on established pyridoxine treatment

| Patient number | Main EEG characteristics (age)                                                                                                                                                                                                                                                    | Clinical situation                                                                                                                                                                                                        |
|----------------|-----------------------------------------------------------------------------------------------------------------------------------------------------------------------------------------------------------------------------------------------------------------------------------|---------------------------------------------------------------------------------------------------------------------------------------------------------------------------------------------------------------------------|
| 2              | 1. Normal (10 d)                                                                                                                                                                                                                                                                  | Routine                                                                                                                                                                                                                   |
| 4              | 1. Moderate DSBA, rare ED, L t-o (13 d)<br><i>Dietary treatment (3 w)</i><br>2. Mild DSBA, rare ED, bil t-o (2.5 mo)<br>3. Rare ED, t-c-p (3 mo)<br>4. Mild DSBA, ED, async bil t-p (1 y)<br>5. Mild ISBA (1.5 y)                                                                 | Routine<br><i>1 d after seizure due to fever/intercurrent illness</i><br><i>Suspected seizures/abnormal movements</i><br>Routine<br>Routine                                                                               |
| 5              | 1. Mild DSBA, MF/bil ED (27 d)<br>2. Mild DSBA, MF/bil ED (31 d)<br>3. Mild DSBA, MF/bil ED (1 mo)<br>4. Mild ISBA L (2 mo)<br><i>Dietary treatment (3 mo)</i><br>5. Normal (7 mo)<br>6. Moderate ED async bil f-c (1.5 y)<br>7. Mild ED bil async f-c (2 y)<br>8. Normal (2.5 y) | Routine<br>Routine<br>Routine<br>Routine<br>Routine<br><i>1 d after seizure without known precipitant</i><br>Routine<br>Routine                                                                                           |
| 6              | 1. Marked DSBA (7 d)<br>2. Mild DSBA (14 d)<br>3. Mild DSBA (1.5 mo)<br><i>Dietary treatment (2 mo)</i><br>4. Normal (4 mo)<br>5. Normal (9 mo)<br>6. Normal (1.5 y)<br>7. Frequent ED p-z (3 y)<br>8. Mild ED p-z in sleep (3 y)                                                 | Routine<br>Routine<br>Routine<br><i>6 d after seizure due to fever/intercurrent illness</i><br><i>Seizure due to fever/intercurrent illness</i><br><i>Seizure due to fever/intercurrent illness</i><br>Routine<br>Routine |
| 7              | <i>Dietary treatment (5 w)</i><br>1. Normal (1.5 y)                                                                                                                                                                                                                               | Routine                                                                                                                                                                                                                   |
| 8              | 1. Normal (2 mo)<br>2. Mild DSBA, freq ED async bil (11 mo)<br>3. Mild DSBA, freq ED async bil (1 y)<br>4. Mild DSBA, freq ED async bil (1 y)<br>5. Mild DSBA, freq ED L (1.5 y)<br>6. Mild DSBA, mod ED L (1.5 y)<br>7. Mild DSBA, mod ED f-c, ECS 1 min PER (2 y)               | Routine<br>Routine<br>Routine<br>Routine<br>Routine<br>Routine<br><i>Seizure due to fever/intercurrent illness</i>                                                                                                        |

|    |                                                                                                                                                                                                                                                                                                                                                                           |                                                                                                                                                                                                                                                                                       |
|----|---------------------------------------------------------------------------------------------------------------------------------------------------------------------------------------------------------------------------------------------------------------------------------------------------------------------------------------------------------------------------|---------------------------------------------------------------------------------------------------------------------------------------------------------------------------------------------------------------------------------------------------------------------------------------|
|    | 8. Mild DSBA, ED R c-p, PER (2 y)<br>9. Mild DSBA, freq ED bil async max R c-p, ECS (2.5 y)<br>10. Moderate DSBA (3 y)<br>11. Mild DSBA, freq ED bil async (5.5 y)<br><i>Dietary treatment (10 y)</i><br>12. Mild DSBA (14 y)                                                                                                                                             | Routine<br><i>Seizures without known precipitant</i><br>Routine<br>Routine<br>Routine                                                                                                                                                                                                 |
| 9  | 1. Mild DSBA (1 mo)<br>2. Mild DSBA (1.5 mo)<br>3. Normal (6 mo)<br>4. Rare ED bil t (9 mo)<br>5. Normal (10 mo)<br>6. Normal (1.5 y)<br>7. Normal (6 y)                                                                                                                                                                                                                  | Routine<br>Routine<br>Routine<br><i>1 day after seizure due to fever/intercurrent illness</i><br>Routine<br>Routine<br>Routine                                                                                                                                                        |
| 10 | 1. Normal (1 y)<br>2. Normal (1.5 y)<br>3. Normal (2 y)<br>4. Normal (2 y)<br>5. Normal (3.5 y)<br>6. Moderate DSBA, MF ED (4.5 y)                                                                                                                                                                                                                                        | <i>Seizure due to fever/intercurrent illness</i><br>Routine<br>Routine<br>Routine<br>Routine<br>Routine                                                                                                                                                                               |
| 11 | 1. Mild MF ED (16 d)<br>2. Mild Alt high amp SBA (10 mo)<br>3. Normal (1 y)                                                                                                                                                                                                                                                                                               | Routine<br>Routine<br><i>2 d after seizure due to fever/intercurrent illness</i>                                                                                                                                                                                                      |
| 12 | 1. Normal (1 mo)<br>2. Normal (1.5 mo)<br>3. Normal (2 mo)<br>4. Normal (6 mo)<br>5. Normal (1 y)<br>6. Normal (4 y)<br>7. Normal (4 y)                                                                                                                                                                                                                                   | Routine<br>Routine<br>Routine<br>Routine<br>Routine<br>Routine<br>Routine                                                                                                                                                                                                             |
| 13 | 1. Moderate Alt high amp SBA (15 d)<br>2. Normal (3 m)<br>3. Marked DSBA (8 mo)<br>4. Moderate DSBA (10 mo)<br>5. Normal (1.5 y)<br>6. Mild DSBA, rare ED R t-p (6 y)<br>7. Normal (8 y)<br>8. Marked DSBA, max R t (8 y)<br>9. Moderate DSBA, max R f-t (8 y)<br>10. Normal (8 y)<br>11. Mild SW R f-t, rare ED R f-t (8 y)<br>12. Moderate DSBA, rare ED bil f-t (12 y) | Routine<br>Routine<br><i>1 d after seizure due to treatment discontinuation</i><br>Routine<br><i>2 d after seizure due to treatment discontinuation</i><br>Routine<br>Routine<br><i>3 d after seizure due to GE/fever/PN interruption</i><br>Routine<br>Routine<br>Routine<br>Routine |

|  |                      |         |
|--|----------------------|---------|
|  | 13. Mild DSBA (13 y) | Routine |
|--|----------------------|---------|

Alt high amp SBA, alternating high amplitude slow background activity; async, asynchronous; bil, bilateral; c, central; d, day; DSBA, diffuse slow background activity; ECS, electroclinical seizure; ED, epileptiform discharges; freq, frequent; f, frontal; GE, gastroenteritis; ISBA, intermittent slow background activity; L, left; max, maximum; mod, moderate; mo, month; MF, multifocal; o, occipital; p, parietal; p-z, parietal midline; PER, photoepileptiform response; SW, slow waves; t, temporal; y, year

Overview of longitudinal EEG background and epileptiform activity in subjects > 16 y on established pyridoxine treatment.

| Patient number | Main EEG characteristics (age)                                                                                                                                                                                                                                                            | Clinical situation                                                                                                                                                                               |
|----------------|-------------------------------------------------------------------------------------------------------------------------------------------------------------------------------------------------------------------------------------------------------------------------------------------|--------------------------------------------------------------------------------------------------------------------------------------------------------------------------------------------------|
| 8              | 1. Mild DSBA (17 y)                                                                                                                                                                                                                                                                       | Routine                                                                                                                                                                                          |
| 9              | 1. Normal (19 y)<br>2. Mild ISBA (26 y)                                                                                                                                                                                                                                                   | Routine<br>Routine                                                                                                                                                                               |
| 10             | 1. Mild DSBA (20 y)<br>2. Mild DSBA (21 y)                                                                                                                                                                                                                                                | Routine<br>Routine                                                                                                                                                                               |
| 11             | 1. Moderate DSBA (19 y)<br>2. Moderate DSBA (19 y)<br>3. Moderate DSBA (20 y)                                                                                                                                                                                                             | Routine<br>Routine<br>Routine                                                                                                                                                                    |
| 12             | 1. Mild DSBA (17 y)<br>2. Mild DSBA (20 y)<br>3. Mild DSBA (22 y)<br>4. Mild DSBA (23 y)<br>5. Mild DSBA (24 y)<br>6. Normal (26 y)                                                                                                                                                       | Routine<br>Routine<br><i>3 d after seizure due to GE/fever/PN interruption</i><br>Routine<br>Routine<br>Routine                                                                                  |
| 13             | 1. Mild DSBA, rare ED async bil f-t (17 y)<br>2. Mild DSBA (29 y)<br>3. Mild DSBA, rare ED async bil f-t (31 y)<br>4. Mild DSBA, rare ED async bil f (33 y)<br>5. Mild DSBA (35 y)<br>6. Mild DSBA, rare ED async bil f (46 y)<br>7. Mild DSBA, rare ED L t (47 y)<br>8. Mild DSBA (55 y) | <i>Routine</i><br><i>6 d after SE abroad due to GE/fever/PN interruption</i><br>Routine<br><i>Seizure without known precipitant (non-adherence?)</i><br>Routine<br>Routine<br>Routine<br>Routine |

asynch, asynchronous; bil, bilateral; d, days; DSBA, diffuse slow background activity; ED, epileptiform discharges; f, frontal; GE, gastroenteritis; ISBA, intermittent slow background activity; L, left; PN, pyridoxine; SE, status epilepticus; t, temporal; y, years
